# Supplementary material for: Impact on Glycemic Variability in Newly Onset T2DM Patients Initiating Dapagliflozin Plus Metformin versus Metformin Alone: A Randomized Open Label Clinical Study. The MAGNNIFY Trial.
Source: Research Square preprint supplement (doi:10.21203/rs.3.rs-3864444/v1), 2024-01-23
Supplement: Supplementary file 1 [file b8fe1d0a122a740ee588c9ce.docx]

Complementary Table 2. Final characteristics DAPA+MET w12 versus MET w12. ITT (n=88)

|  | DAPA+ MET n=42 | MET  n=46 |
| --- | --- | --- |
| MAGE mmol/L | 3.5 ± 1.5 | 4.0 ± 1.6 |
| TIR % very high >250 mg/dL | 0 (0.0-1.2) | 0 (0.0-1.7) |
| TIR % high >180 mg/dL | 5 (0.0-10.5) | 8.8 (0.0-27.1) |
| TIR % target 70-180 mg/dL | 92.9 (85.5-99.3) | 84.2 (70.1-95.5) |
| TIR % low <70 mg/dL | 0 (0.0-0.1) | 0 (0.0-0.7) |
| TIR % very low <54 mg/dL | 0 (0-0) | 0 (0-0) |
| age years | 53.7 ± 8.6 | 50.9 ± 11.8 |
| women | 22 (53%) | 23 (50%) |
| BMI kg/m2 | 29.4 ± 5.4 | 29.8 ± 3.2 |
| weight kg | 78.8 ± 19.3 | 79.4 ± 14.0 |
| HbA1c% | 7.4 ± 1.3 | 7.7 ± 1.7 |
| glucose mg/dL | 134.5 ± 33.2 | 147.2 ± 50.1 |
| Insulin µU/mL | 9.5 ± 6.4 | 12.5 ± 9.4 |
| total cholesterol mg/dL | 189.4 ± 44.3 | 185.7 ± 38.2 |
| HDL mg/dL | 46.2 ± 10.5 | 42.8 ± 10.6 |
| LDL mg/dL | 112.8 ± 36.5 | 105.9 ± 30.9 |
| triglycerides mg/dL | 145.0 (116.5-188.5) | 102.5 (89.0-126.7) |
| ALT U/L | 21.0 (17.5-29.2) | 28.5 (21.0-43.2) |
| AST U/L | 20.5 (18-23.2) | 26.0 (19.7-32.0) |
| uric acid mg/dL | 5.1 ± 1.0 | 5.6 ± 1.2 |
| serum creatinine mg/dL | 0.76 ± 0.20 | 0.72 ± 0.17 |
| eGFR mL/min/1.73 m2 | 95.9 ± 14.8 | 103.7 ± 13.1 |
| urinary albumin mg/dL | 2.3 ± 4.6 | 2.9 ± 4.7 |
| muscle % | 27.5 ± 5.4 | 27.5 ± 5.3 |
| fat % | 36.2 ± 9.7 | 36.7 ± 8.4 |
| visceral fat % | 11.9 ± 6.1 | 11.9 ± 3.9 |
| acantosis % | 45 | 61 |
| skin tags % | 38 | 50 |
| neck circumference cm | 39.5 ± 4.3 | 40.0 ± 4.2 |
| waist circumference cm | 96.9 ± 12.6 | 99.6 ± 12.7 |
| abdominal circumference cm | 99.0 ± 14.5 | 102.9 ± 12.8 |
| wrist circumference cm | 16.7 ± 1.6 | 16.7 ± 1.5 |
| SBP mm/Hg | 131.7 ± 18.5 | 131.4 ± 15.8 |
| DBP mm/Hg | 84.6 ± 11.5 | 82.8 ± 10.5 |
| pulse bpm | 70.5 ± 6.9 | 71.1 ± 9.1 |
