# Supplementary material for: Impact on Glycemic Variability in Newly Onset T2DM Patients Initiating Dapagliflozin Plus Metformin versus Metformin Alone: A Randomized Open Label Clinical Study. The MAGNNIFY Trial.
Source: Research Square preprint supplement (doi:10.21203/rs.3.rs-3864444/v1), 2024-01-23
Supplement: Supplementary file 2 [file e3bb53de9f6ec0a1db2c87d8.docx]

Complementary Table 1. Events of the study in chronological order.

| Week | Visit | Events |
| --- | --- | --- |
|  |  | Inform consent form signed. Evaluation of compliance with inclusion criteria and none of exclusion.  Washout period |
| W0 | Visit 1 | Screening: clinic history, baseline laboratories, CGM placement, anthropometric measurements, and physical examination. |
| W1 | Visit 2 | Randomization and treatment group assignment, diet plan prescription, CGM removal. |
| W2-W11 | Visits 3 and 4 | Anthropometric measurements and physical examination. |
| W12 | Visit 5 | CGM placement. |
| W12 | Visit 6 | Baseline laboratories, CGM removal, anthropometric measurements, and physical examination. |
